# Supplementary material for: 内部に脂肪成分を含んだ後縦隔原発神経節細胞腫(ganglioneuroma)の1例
Source: Royal Society of Chemistry journal article supplement (doi:10.1039/d1cp05342f), 2001-10-10
Supplement: d1cp05342f1.pdf [file d1cp05342f1.pdf]

## Supporting Information

### **The synergetic effect of aqua ligand and metal site on performance of single-atom catalysts in H<sub>2</sub>O<sub>2</sub> synthesis: a Density Functional Theory Study**

Xin-cheng Zhu<sup>#1,2</sup>, Wei Zhang<sup>#2</sup>, Qian Xia<sup>#1</sup>, An-Fu Hu<sup>1</sup>, Jian Jiang<sup>\*1</sup>, Qiao-jun Fang,<sup>2</sup> Gui-lin Zhuang<sup>\*2</sup>

<sup>1</sup>China Tobacco Zhejiang Industrial Co., Ltd.

<sup>2</sup>Institute of Industrial Catalysis, State Key Laboratory Breeding Base of Green-Chemical Synthesis Technology, College of Chemical Engineering, Zhejiang University of Technology, Hangzhou 310032, P.R. China.

\*Email: [jiangj@zjtobacco.com](mailto:jiangj@zjtobacco.com)( J. Jiang ) , [glzhuang@zjut.edu.cn](mailto:glzhuang@zjut.edu.cn) (G. L. Zhuang)

Author Contributions

# These authors contributed equally.

## Table of contents

|                                                                                                                                                                                                                                                                                                                                                            |            |
|------------------------------------------------------------------------------------------------------------------------------------------------------------------------------------------------------------------------------------------------------------------------------------------------------------------------------------------------------------|------------|
| <b>Computational Details</b> .....                                                                                                                                                                                                                                                                                                                         | <b>S1</b>  |
| <b>Figure S1.</b> The optimized (a) $C_6N_6$ primitive cell structure (top view), the lattice parameter and the bond length of C-N and C-C bond, (b) $C_6N_6$ supercell structure ( $2 \times 2 \times 1$ , top view), the lattice parameter and the bond length of C-N bond, C-C bond and N-N bond (in hole, symmetry). C atom: brown, N atom: blue. .... | <b>S3</b>  |
| <b>Figure S2.</b> The optimized structures of 29 $TM@C_6N_6$ in top view (TM = 3d (Sc - Zn), 4d (Y - Cd) and 5d (Hf - Hg) ). C atom: brown, N atom: blue, TM single atom (colorful) in the hole of $C_6N_6$ . ....                                                                                                                                         | <b>S4</b>  |
| <b>Figure S3.</b> The electrostatic potential of 29 $TM@C_6N_6$ . (TM = 3d (Sc - Zn), 4d (Y - Cd) and 5d (Hf - Hg) ). ....                                                                                                                                                                                                                                 | <b>S5</b>  |
| <b>Figure S4.</b> The adsorption configuration relaxed of $O_2$ molecule on $TM@C_6N_6$ in top view (TM = 3d (Sc - Zn), 4d (Y - Cd) and 5d (Hf - Hg) ). C atom: brown, N atom: blue, O atom: red, TM single atom (colorful) in the hole of $C_6N_6$ . ....                                                                                                 | <b>S6</b>  |
| <b>Figure S5.</b> The structure (top view and side view) (a) and the temperature and system energy variations (b) of $Cu@C_6N_6$ catalyst through AIMD simulation under 500 K for 10 ps with a time step of 0.5 fs. C atom: brown, N atom: blue, Cu atom: orange. ....                                                                                     | <b>S7</b>  |
| <b>Figure S6.</b> The structure (top view and side view) (a) and the temperature and system energy variations (b) of $Cu@C_6N_6$ with an aqua ligand through AIMD simulation under 298.15 K for 10 ps with a time step of 0.5 fs. C atom: brown, N atom: blue, O atom: red, H atom: white, Cu atom: orange. ....                                           | <b>S8</b>  |
| <b>Figure S7.</b> (a) Variations of temperature and system energy against the time via AIMD simulation of 5 ps under 298.15 K with a time step of 1 fs, and (b) The fully relaxed structure (side and top views) for $Cu@C_6N_6$ system with 30 $H_2O$ explicit molecules. C atom: brown, N atom: blue, O atom: red, H atom: white, Cu atom: orange. ....  | <b>S9</b>  |
| <b>Figure S8.</b> The -pCOHP curve of O-O bond for free $O_2$ molecule. ....                                                                                                                                                                                                                                                                               | <b>S10</b> |
| <b>Table S1.</b> The binding energy ( $E_b$ ) between TM single atom and $C_6N_6$ , the cohesive energy ( $E_{coh}$ ) of TM bulk structure and the difference ( $E_f$ ) between them for TM single                                                                                                                                                         |            |

|                                                                                                                                                                                                                 |     |
|-----------------------------------------------------------------------------------------------------------------------------------------------------------------------------------------------------------------|-----|
| atom embedded in the $C_6N_6$ , the diffusion energy ( $E_{diff}$ ) of TM single atom from $TM@C_6N_6$ and the difference ( $E_{diff} - E_f$ ) between $E_{diff}$ and $E_f$ . (unit: eV).....                   | S11 |
| <b>Table S2.</b> The number of charge transfer from TM single atom to $C_6N_6$ substrate via Bader charge analysis for 29 $TM@C_6N_6$ . (unit: $e$ ) .....                                                      | S12 |
| <b>Table S3.</b> The adsorption energy ( $\Delta E_{O_2^*}$ ) of $O_2$ molecule on the surface of 29 $TM@C_6N_6$ . (unit: eV) .....                                                                             | S13 |
| <b>Table S4.</b> The O-O bond length of $O_2^*$ , $OOH^*$ and $H_2O_2^*$ on 11 $TM@C_6N_6$ (O-O bond lengths of $O_2$ , $OOH$ , $H_2O_2$ are 1.23 Å, 1.35 Å and 1.48 Å in vacuum, respectively. (unit: Å) ..... | S14 |
| <b>Table S5.</b> The O-O bond length of $O_2^*$ , $OOH^*$ and $H_2O_2^*$ on $Cu@C_6N_6$ with a adsorbed $H_2O$ . (unit: Å) .....                                                                                | S15 |
| <b>Table S6.</b> The adsorption strengths ( $\Delta E_{O_2^*}$ , $\Delta G_{OOH^*}$ , $\Delta G_{O^*}$ , $\Delta G_{OH^*}$ ) of reaction ( $O_2$ ) and intermediates ( $OOH$ , $O$ , $OH$ ). (unit: eV).....    | S16 |
| <b>Table S7.</b> The number of positive charge ( $N_{pc}$ ) for 29 active metals. (unit: $e$ ) .....                                                                                                            | S17 |
| <b>Table S8.</b> The obtained electron ( $Q_{O_2}$ ) of adsorbed $O_2$ possessed by 29 $TM@C_6N_6$ . (unit: $e$ ).....                                                                                          | S18 |
| <b>Table S9.</b> The $d$ -band center ( $\varepsilon_d$ ) of TM for 29 $TM@C_6N_6$ . (unit: eV) .....                                                                                                           | S19 |
| <b>Table S10.</b> The integrater crystal orbit Hamilton population (ICOHP) between TM and $O_2$ for $TM@C_6N_6$ .....                                                                                           | S20 |
| <b>Reference</b> .....                                                                                                                                                                                          | S21 |

## Computational Details

The adsorption energy of adsorbate on the catalyst is computed as following:

$$E_{\text{ads}} = E_{\text{tot}} - E_{\text{TM@substrate}} - E_{\text{adsorbate}} \quad (\text{SI-1})$$

where  $E_{\text{tot}}$ ,  $E_{\text{TM@substrate}}$ , and  $E_{\text{adsorbate}}$  are the total energies of the catalyst with adsorbate, TM@substrate, and isolated adsorbed pieces in vacuum, respectively.

In this work, the computational hydrogen electrode (CHE) model, proposed by Nørskov et al.<sup>1</sup> was adopted to evaluate the Gibbs free energy ( $\Delta G$ ) for elementary steps of the ORR. And in line with the standard hydrogen electrode (SHE) model developed by Nørskov and co-worker<sup>2</sup> the chemical potential of the  $\text{H}^+ / \text{e}^-$  pair is equal to half of a hydrogen molecule in gas phase ( $\text{H}^+ + \text{e}^- \leftrightarrow 1/2\text{H}_2$ ). The reaction free energy is defined as the following equation:

$$\Delta G = \Delta E + \Delta ZPE - T\Delta S + \Delta G_{\text{U}} + \Delta G_{\text{pH}} \quad (\text{SI-2})$$

where  $\Delta E$  stands for the change of electronic energy obtained from the DFT calculations,  $ZPE$  is the zero-point energy,  $T\Delta S$  represents for the entropy contributions, of which  $T$  is the temperature (298.15K) and  $\Delta S$  is the entropy change. The bias effect on the free energy is considered in the parameter ( $\Delta G_{\text{U}}$ ),

$$\Delta G_{\text{U}} = -neU \quad (\text{SI-3})$$

where  $n$  is the number of  $\text{H}^+ / \text{e}^-$  pairs transferred in the reaction,  $e$  is the transferred charge and the  $U$  is the potential applied at the electrode.

The pH effect is considered in the parameter ( $\Delta G_{\text{pH}}$ ),

$$\Delta G_{\text{pH}} = -k_{\text{B}}T \ln \text{H}^+ = \text{pH} \times k_{\text{B}}T \ln 10 \quad (\text{SI-4})$$

where  $k_{\text{B}}$  is the Boltzmann constant, the value of pH is set to be 0 and  $T$  is set to 298.15 K.

The overpotentials ( $\eta$ ) of  $2\text{e}^-$  ORR and  $4\text{e}^-$  ORR can be determined as following:

$$G_{2\text{e}^- \text{ ORR}} = U_{\text{L}} = \max \{ \Delta G_1, \Delta G_2 \} \quad (\text{SI-5})$$

$$\eta_{2\text{e}^- \text{ ORR}} = G_{2\text{e}^- \text{ ORR}} / e - 0.70 \text{ V} \quad (\text{SI-6})$$

$$G_{4\text{e}^- \text{ ORR}} = U_{\text{L}} = \max \{ \Delta G_3, \Delta G_4, \Delta G_5, \Delta G_6 \} \quad (\text{SI-7})$$

$$\eta_{4\text{e}^- \text{ ORR}} = G_{4\text{e}^- \text{ ORR}} / e - 1.23 \text{ V} \quad (\text{SI-8})$$

where  $\Delta G_1, \Delta G_2, \Delta G_3, \Delta G_4, \Delta G_5, \Delta G_6$  are the free energy of reactions in  $2e^-$  ORR and  $4e^-$  ORR, the 0.70 V and 1.23 V are the equilibrium potential of  $2e^-$  and  $4e^-$  mechanism, respectively.

### **The evaluating method of $2e^-$ ORR selectivity**

The selectivity of  $2e^-$  ORR can be simply estimated according to the Boltzmann distribution at corresponding the reaction temperature, which is the  $f_{2e^- \text{ ORR}} = 1 / (1 + \exp \{ -\delta G / k_B T \} )^3$ , where the  $\delta G$  is the free energy barrier difference between the energy barrier of the potential-limiting step for  $2e^-$  ORR and the active barrier of the corresponding reaction step for  $4e^-$  ORR, calculated by the  $G_{4e^- \text{ ORR}} - G_{2e^- \text{ ORR}}$ .  $k_B$  is the Boltzmann constant, the value of  $T$  is temperature, set to 298.15 K.

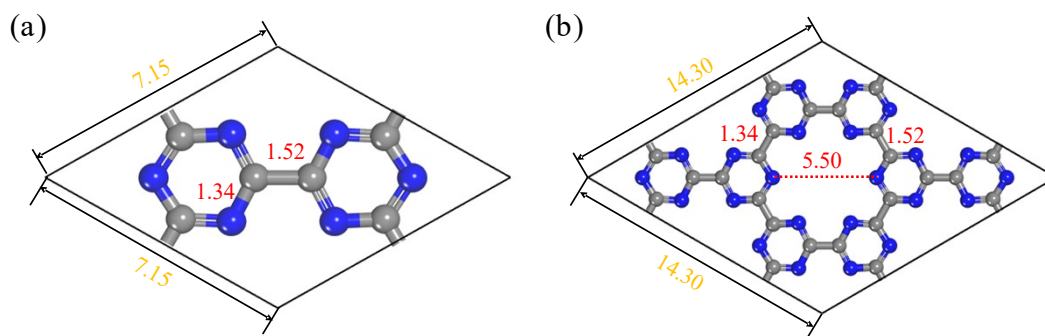

**Figure S1.** The optimized (a)  $C_6N_6$  primitive cell structure (top view), the lattice parameter and the bond length of C-N and C-C bond, (b)  $C_6N_6$  supercell structure ( $2 \times 2 \times 1$ , top view), the lattice parameter and the bond length of C-N bond, C-C bond and N-N bond (in hole, symmetry). C atom: brown, N atom: blue.

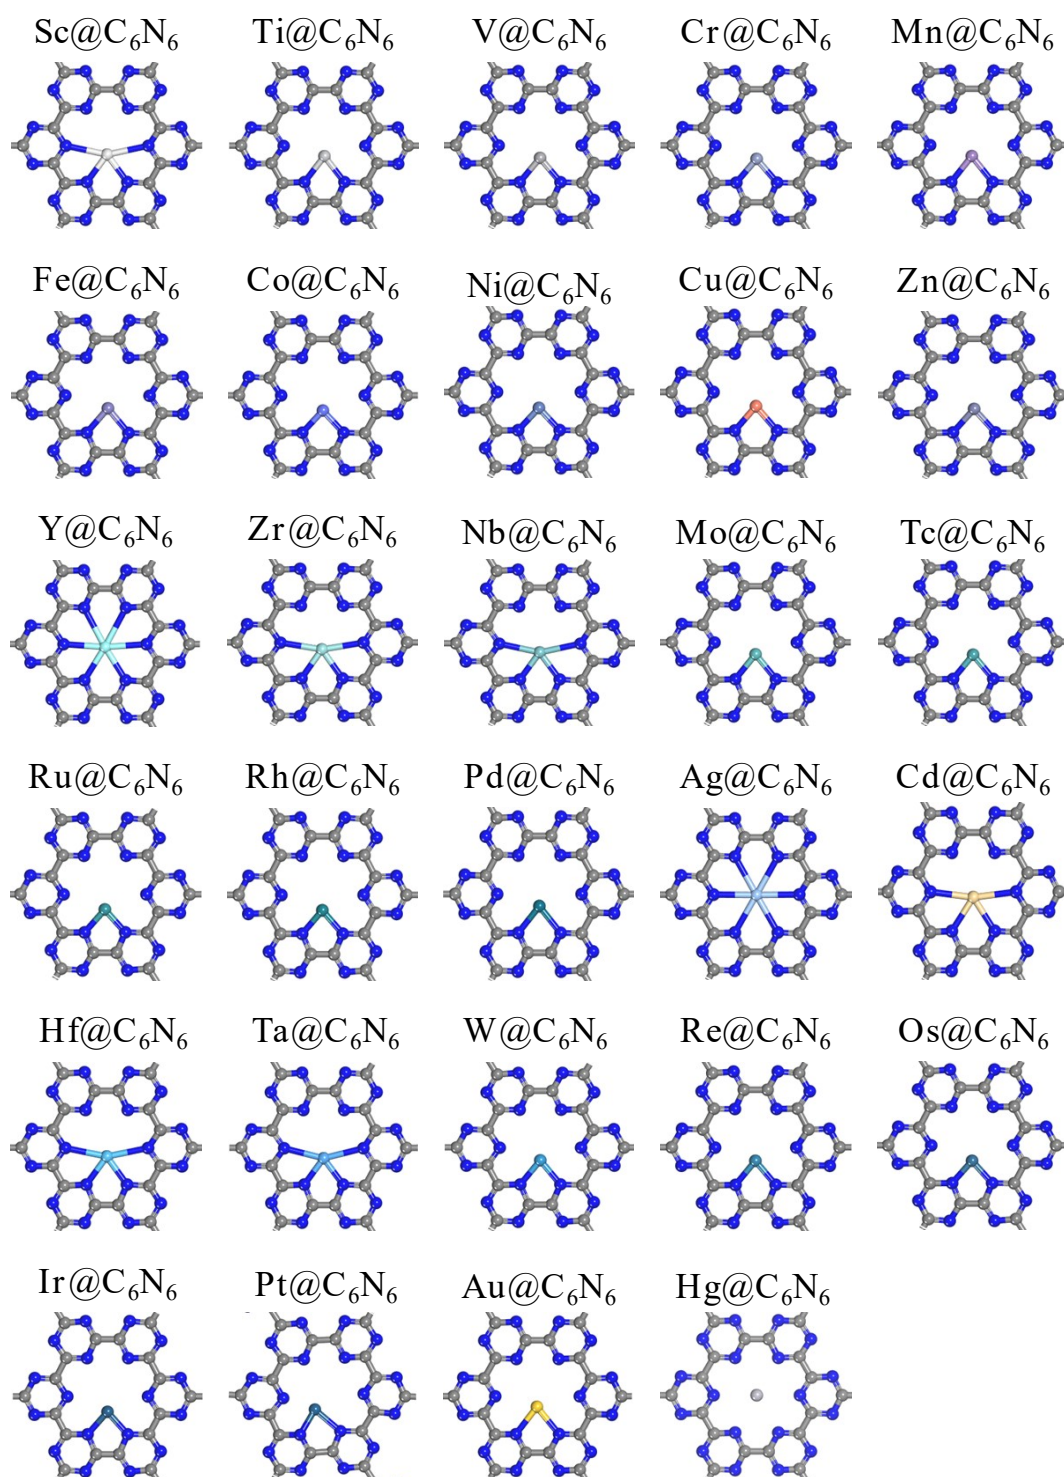

**Figure S2.** The optimized structures of 29 TM@C<sub>6</sub>N<sub>6</sub> in top view (TM = 3d (Sc - Zn), 4d (Y - Cd) and 5d (Hf - Hg)). C atom: brown, N atom: blue, TM single atom (colorful) in the hole of C<sub>6</sub>N<sub>6</sub>.

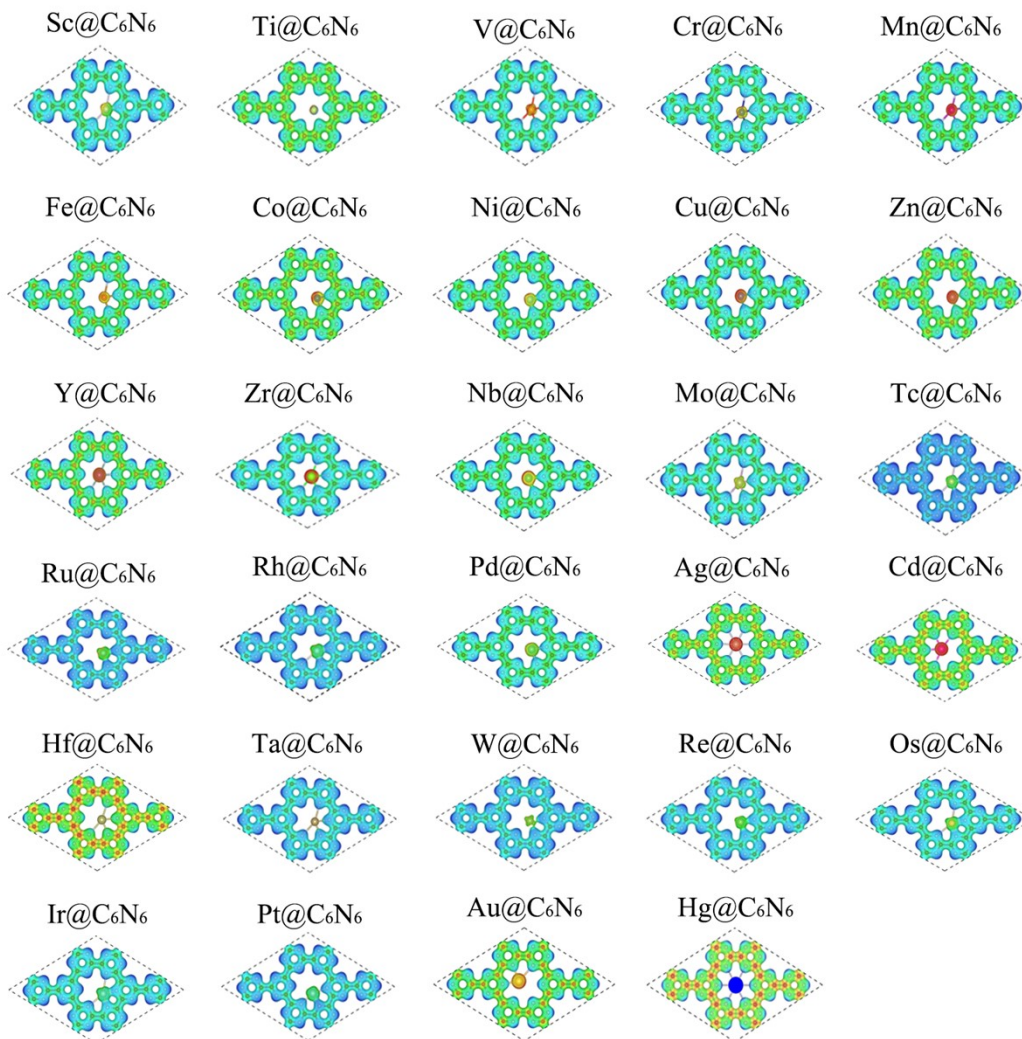

**Figure S3.** The electrostatic potential of 29 TM@C<sub>6</sub>N<sub>6</sub>. (TM = 3*d* (Sc - Zn), 4*d* (Y - Cd) and 5*d* (Hf - Hg) ).



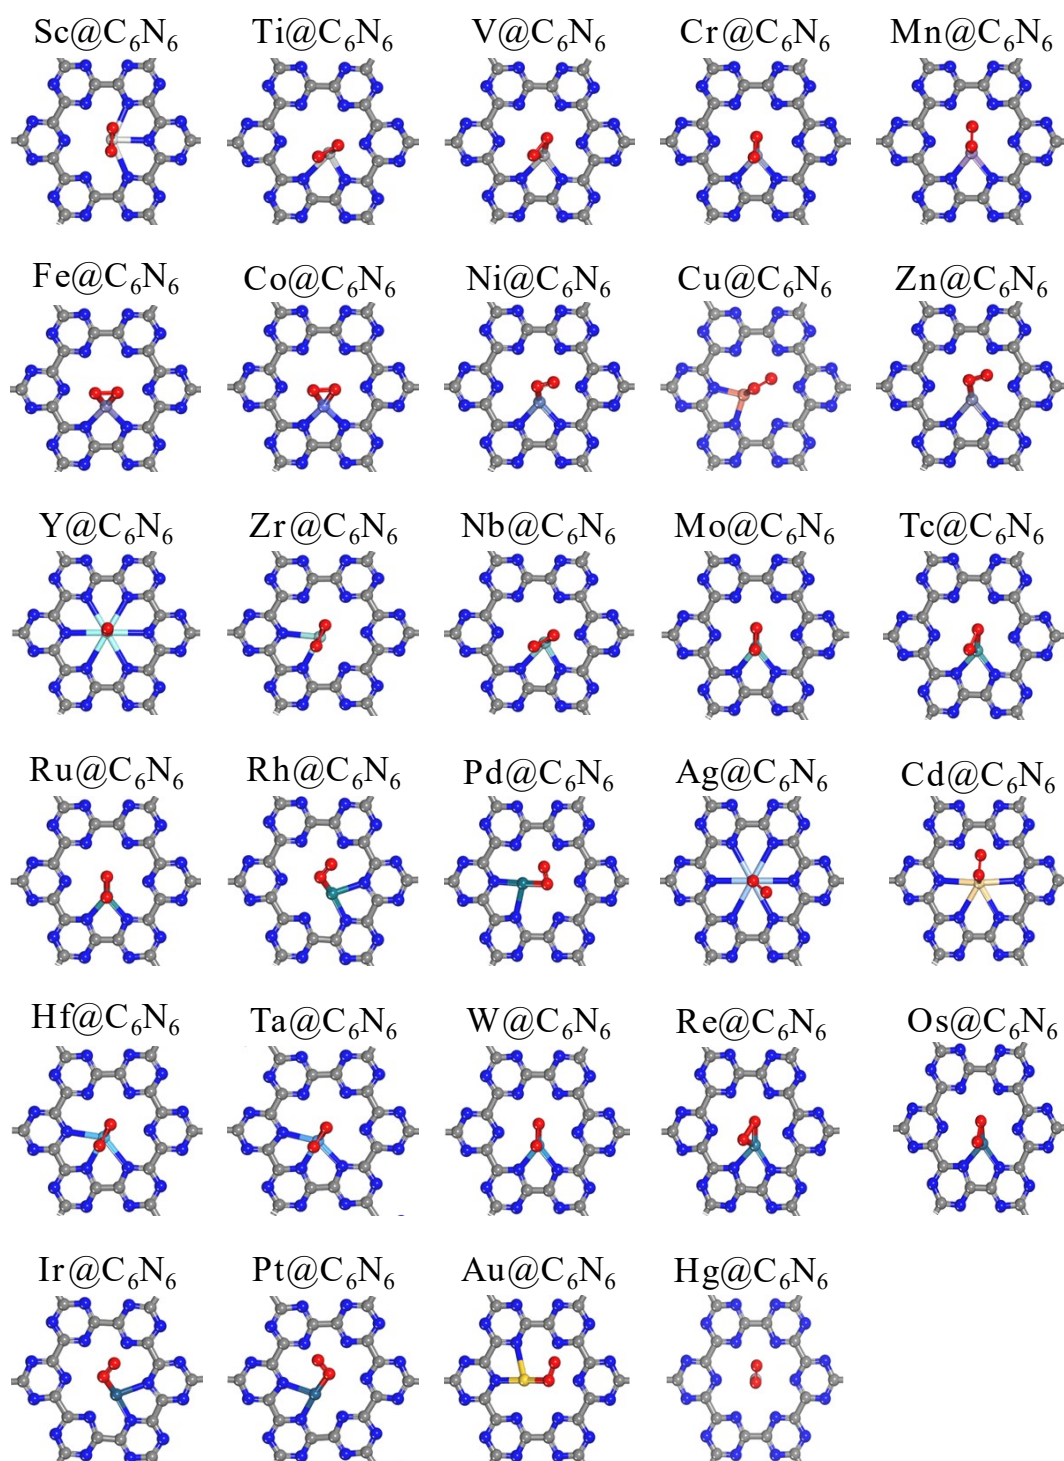

**Figure S4.** The adsorption configuration relaxed of O<sub>2</sub> molecule on TM@C<sub>6</sub>N<sub>6</sub> in top view (TM = 3*d* (Sc - Zn), 4*d* (Y - Cd) and 5*d* (Hf - Hg) ). C atom: brown, N atom: blue, O atom: red, TM single atom (colorful) in the hole of C<sub>6</sub>N<sub>6</sub>.

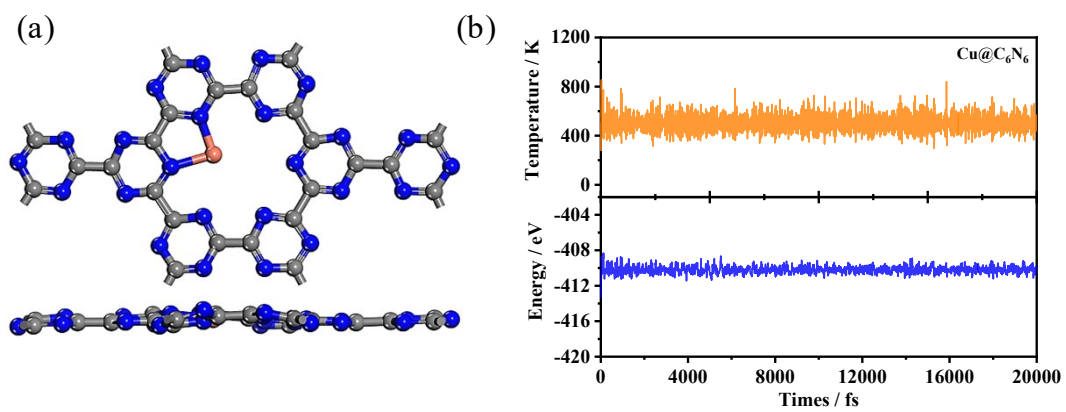

**Figure S5.** The structure (top view and side view) (a) and the temperature and system energy variations (b) of Cu@C<sub>6</sub>N<sub>6</sub> catalyst through AIMD simulation under 500 K for 10 ps with a time step of 0.5 fs. C atom: brown, N atom: blue, Cu atom: orange.

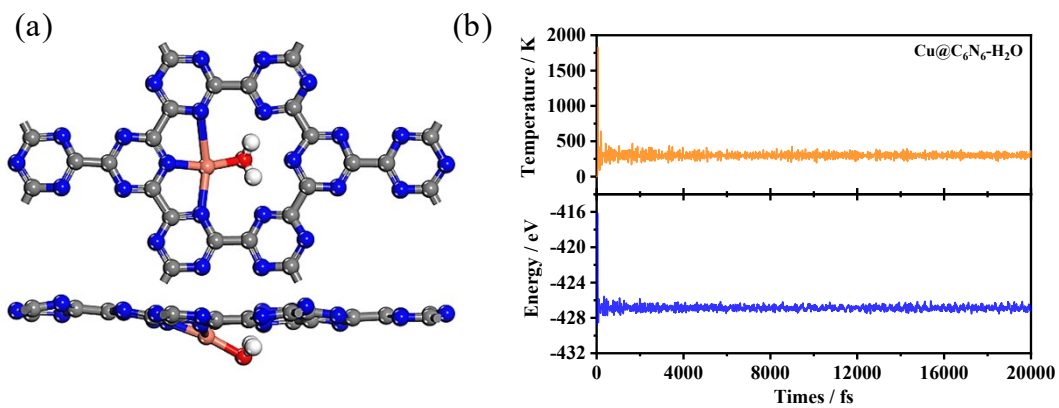

**Figure S6.** The structure (top view and side view) (a) and the temperature and system energy variations (b) of Cu@C<sub>6</sub>N<sub>6</sub> with an aqua ligand through AIMD simulation under 298.15 K for 10 ps with a time step of 0.5 fs. C atom: brown, N atom: blue, O atom: red, H atom: white, Cu atom: orange.

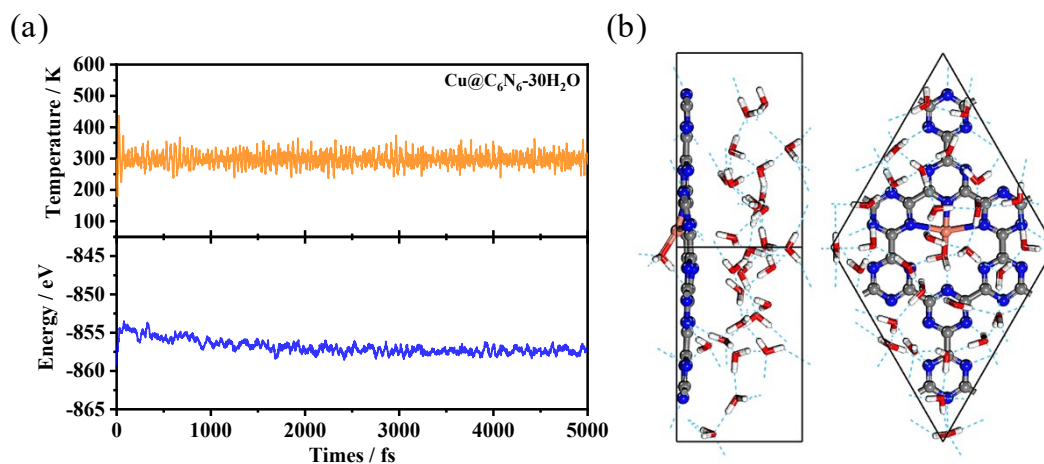

**Figure S7.** (a) Variations of temperature and system energy against the time via AIMD simulation of 5 ps under 298.15 K with a time step of 1.0 fs, and (b) The fully relaxed structure (side and top views) for Cu@C<sub>6</sub>N<sub>6</sub> system with 30 H<sub>2</sub>O explicit molecules. C atom: brown, N atom: blue, O atom: red, H atom: white, Cu atom: orange.

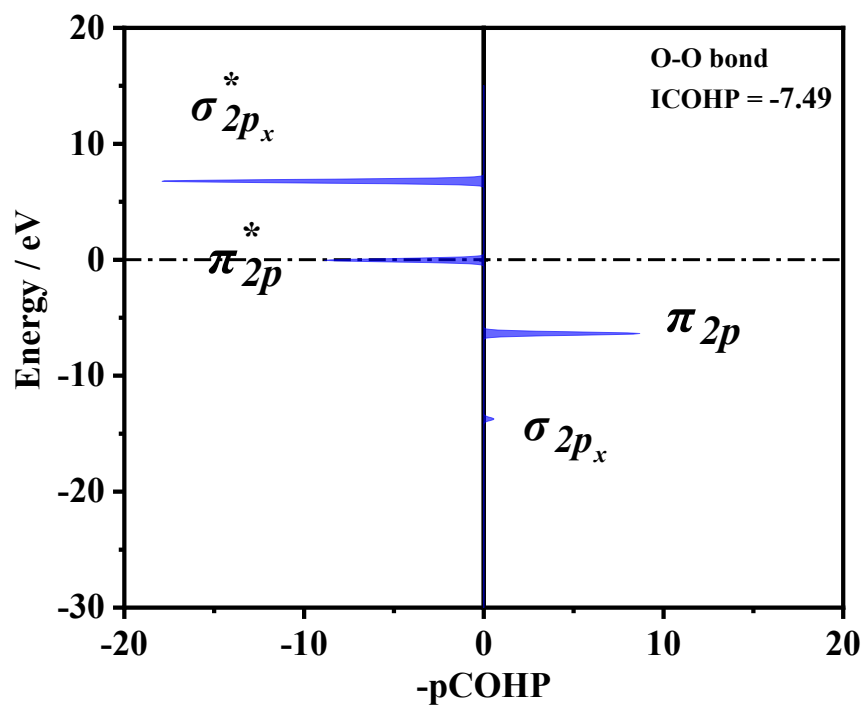

**Figure S8.** The -pCOHP curve of O-O bond for free O<sub>2</sub> molecule.

**Table S1.** The binding energy ( $E_b$ ) between TM single atom and  $C_6N_6$ , the cohesive energy ( $E_{coh}$ ) of TM bulk structure and the difference ( $E_f$ ) between them for TM single atom embedded in the  $C_6N_6$ , the diffusion energy ( $E_{diff}$ ) of TM single atom from  $TM@C_6N_6$  and the difference ( $E_{diff} - E_f$ ) between  $E_{diff}$  and  $E_f$ . (unit: eV)

| TM | $E_{TM}$ (single) | $E_b$ | $E_{TM}$ (bulk) | N | $E_{coh}$ | $E_f$ | $E_{diff}$ | $E_{diff} - E_f$ |
|----|-------------------|-------|-----------------|---|-----------|-------|------------|------------------|
| Sc | -1.95             | -7.54 | -12.39          | 2 | -4.24     | -3.30 | 7.38       | /                |
| Ti | -2.38             | -6.99 | -15.51          | 2 | -5.38     | -1.62 | 6.75       | /                |
| V  | -3.69             | -5.93 | -17.85          | 2 | -5.23     | -0.70 | 5.82       | /                |
| Cr | -5.44             | -4.53 | -18.93          | 2 | -4.03     | -0.51 | 7.59       | /                |
| Mn | -5.10             | -4.37 | -35.59          | 4 | -3.79     | -0.57 | 7.35       | /                |
| Fe | -3.38             | -3.76 | -16.45          | 2 | -4.85     | 1.09  | 5.70       | 4.60             |
| Co | -1.57             | -4.81 | -14.07          | 2 | -5.47     | 0.66  | 5.46       | 4.80             |
| Ni | -0.29             | -4.89 | -21.87          | 4 | -5.17     | 0.29  | 4.83       | 4.54             |
| Cu | -0.29             | -3.29 | -14.91          | 4 | -3.43     | 0.14  | 3.32       | 3.18             |
| Zn | -0.01             | -1.28 | -2.19           | 2 | -1.09     | -0.19 | 1.26       | /                |
| Y  | -2.44             | -8.39 | -12.86          | 2 | -3.99     | -4.40 | 8.40       | /                |
| Zr | -2.54             | -8.28 | -17.04          | 2 | -5.98     | -2.31 | 8.55       | /                |
| Nb | -3.66             | -6.89 | -20.42          | 2 | -6.55     | -0.35 | 7.22       | /                |
| Mo | -4.59             | -5.40 | -21.89          | 2 | -6.36     | 0.96  | 5.39       | 4.43             |
| Tc | -3.42             | -5.60 | -20.75          | 2 | -6.96     | 1.36  | 5.46       | 4.10             |
| Ru | -1.24             | -6.57 | -18.50          | 2 | -8.01     | 1.44  | 6.40       | 4.97             |
| Rh | -1.29             | -5.33 | -29.09          | 4 | -5.99     | 0.65  | 5.31       | 4.66             |
| Pd | -1.46             | -3.29 | -20.81          | 4 | -3.74     | 0.45  | 3.23       | 2.78             |
| Ag | -0.20             | -2.96 | -10.84          | 4 | -2.51     | -0.45 | 2.95       | /                |
| Cd | -0.01             | -1.35 | -1.44           | 2 | -0.71     | -0.65 | 1.35       | /                |
| Hf | -3.37             | -8.45 | -19.92          | 2 | -6.59     | -1.86 | 8.20       | /                |
| Ta | -3.61             | -7.90 | -23.73          | 2 | -8.25     | 0.35  | 8.38       | 8.03             |
| W  | -4.54             | -6.26 | -26.03          | 2 | -8.47     | 2.22  | 7.80       | 5.58             |
| Re | -4.61             | -5.03 | -24.85          | 2 | -7.82     | 2.79  | 6.21       | 3.42             |
| Os | -2.89             | -5.72 | -24.18          | 2 | -9.20     | 3.47  | 6.82       | 3.35             |
| Ir | -1.43             | -5.84 | -35.33          | 4 | -7.40     | 1.57  | 5.66       | 4.09             |
| Pt | -0.55             | -4.38 | -24.34          | 4 | -5.53     | 1.15  | 4.30       | 3.15             |
| Au | -0.18             | -2.10 | -12.78          | 4 | -3.01     | 0.91  | 2.09       | 1.18             |
| Hg | -0.01             | -0.39 | -0.38           | 2 | -0.18     | -0.21 | 0.38       | /                |

**Table S2.** The number of charge transfer from TM single atom to C<sub>6</sub>N<sub>6</sub> substrate via Bader charge analysis for 29 TM@C<sub>6</sub>N<sub>6</sub>. (unit: *e*)

| <b>TM</b> | <b>Charge transfer</b> |
|-----------|------------------------|
| Sc        | 1.67                   |
| Ti        | 1.38                   |
| V         | 1.21                   |
| Cr        | 1.23                   |
| Mn        | 1.26                   |
| Fe        | 1.11                   |
| Co        | 0.85                   |
| Ni        | 0.77                   |
| Cu        | 0.72                   |
| Zn        | 1.06                   |
| Y         | 2.08                   |
| Zr        | 1.68                   |
| Nb        | 1.52                   |
| Mo        | 1.19                   |
| Tc        | 1.09                   |
| Ru        | 0.70                   |
| Rh        | 0.63                   |
| Pd        | 0.57                   |
| Ag        | 0.68                   |
| Cd        | 1.16                   |
| Hf        | 1.62                   |
| Ta        | 1.54                   |
| W         | 1.29                   |
| Re        | 1.16                   |
| Os        | 0.91                   |
| Ir        | 0.64                   |
| Pt        | 0.60                   |
| Au        | 0.48                   |
| Hg        | 0.10                   |

**Table S3.** The adsorption energy ( $\Delta E_{O_2^*}$ ) of O<sub>2</sub> molecule on the surface of 29 TM@C<sub>6</sub>N<sub>6</sub>. (unit: eV)

| TM | $\Delta E_{O_2^*}$ |
|----|--------------------|
| Sc | -3.37              |
| Ti | -3.81              |
| V  | -2.96              |
| Cr | -2.16              |
| Mn | -1.26              |
| Fe | -2.65              |
| Co | -1.90              |
| Ni | -0.87              |
| Cu | -0.68              |
| Zn | -1.16              |
| Y  | -2.22              |
| Zr | -4.38              |
| Nb | -3.72              |
| Mo | -2.84              |
| Tc | -2.28              |
| Ru | -1.79              |
| Rh | -0.85              |
| Pd | -1.06              |
| Ag | -0.13              |
| Cd | -0.36              |
| Hf | -4.54              |
| Ta | -4.19              |
| W  | -3.70              |
| Re | -2.88              |
| Os | -1.97              |
| Ir | -1.09              |
| Pt | -1.08              |
| Au | -0.30              |
| Hg | 0.82               |



**Table S4.** The O-O bond length of O<sub>2</sub>\*, OOH\* and H<sub>2</sub>O<sub>2</sub>\* on 11 TM@C<sub>6</sub>N<sub>6</sub> (O-O bond lengths of O<sub>2</sub>, OOH, H<sub>2</sub>O<sub>2</sub> are 1.23 Å, 1.35 Å and 1.48 Å in vacuum, respectively. (unit: Å)

| TM | O-O bond length  |      |                                 |
|----|------------------|------|---------------------------------|
|    | O <sub>2</sub> * | OOH* | H <sub>2</sub> O <sub>2</sub> * |
| Mn | 1.31             | 1.46 | /                               |
| Co | 1.37             | 1.45 | /                               |
| Ni | 1.29             | 1.42 | 1.51                            |
| Cu | 1.29             | 1.40 | 1.49                            |
| Zn | 1.32             | 1.46 | 1.48                            |
| Ru | 1.41             | /    | /                               |
| Rh | 1.29             | 1.42 | 1.49                            |
| Pd | 1.30             | 1.43 | 1.46                            |
| Os | 1.44             | /    | /                               |
| Ir | 1.31             | 1.44 | 1.50                            |
| Pt | 1.30             | 1.43 | /                               |

**Table S5.** The O-O bond length of O<sub>2</sub>\*, OOH\* and H<sub>2</sub>O<sub>2</sub>\* on Cu@C<sub>6</sub>N<sub>6</sub> with a adsorbed H<sub>2</sub>O. (unit: Å)

| <b>O-O bond length</b> |      |                                 |
|------------------------|------|---------------------------------|
| O <sub>2</sub> *       | OOH* | H <sub>2</sub> O <sub>2</sub> * |
| 1.28                   | 1.40 | 1.47                            |

**Table S6.** The adsorption strengths ( $\Delta E_{O_2^*}$ ,  $\Delta G_{OOH^*}$ ,  $\Delta G_{O^*}$ ,  $\Delta G_{OH^*}$ ) of reaction ( $O_2$ ) and intermediates (OOH, O, OH). (unit: eV)

| TM | $\Delta E_{O_2^*} / \text{eV}$ | $\Delta G_{OOH^*} / \text{eV}$ | $\Delta G_{O^*} / \text{eV}$ | $\Delta G_{OH^*} / \text{eV}$ |
|----|--------------------------------|--------------------------------|------------------------------|-------------------------------|
| Sc | -3.37                          | 1.97                           | -0.29                        | -1.28                         |
| Ti | -3.81                          | -0.70                          | -0.94                        | -0.81                         |
| V  | -2.96                          | -0.84                          | -0.38                        | -0.38                         |
| Cr | -2.16                          | 3.04                           | 0.70                         | 0.03                          |
| Mn | -1.26                          | 3.46                           | 1.33                         | 1.52                          |
| Fe | -2.65                          | 2.59                           | 0.68                         | -0.55                         |
| Co | -1.90                          | 3.16                           | 1.62                         | 0.49                          |
| Ni | -0.87                          | 3.85                           | 2.35                         | 0.80                          |
| Cu | -0.68                          | 4.20                           | 3.08                         | 1.16                          |
| Zn | -1.16                          | 3.41                           | 2.66                         | 0.02                          |
| Y  | -2.22                          | 2.24                           | 0.27                         | -1.40                         |
| Zr | -4.38                          | -1.02                          | -1.89                        | -1.51                         |
| Nb | -3.72                          | -1.92                          | -1.34                        | -0.80                         |
| Mo | -2.84                          | -0.75                          | -0.20                        | -0.07                         |
| Tc | -2.28                          | 3.07                           | 0.13                         | 0.07                          |
| Ru | -1.79                          | 1.58                           | 1.14                         | 0.55                          |
| Rh | -0.85                          | 3.71                           | 2.16                         | 0.91                          |
| Pd | -1.06                          | 3.90                           | 3.16                         | 1.30                          |
| Ag | -0.13                          | 5.26                           | 4.46                         | 2.22                          |
| Cd | -0.36                          | 3.92                           | 3.42                         | 0.67                          |
| Hf | -4.54                          | -1.26                          | -1.83                        | -1.72                         |
| Ta | -4.19                          | -2.54                          | -1.67                        | -1.07                         |
| W  | -3.70                          | -2.49                          | -1.06                        | -1.00                         |
| Re | -2.88                          | -1.11                          | -0.41                        | -0.50                         |
| Os | -1.97                          | 0.69                           | 0.65                         | 0.22                          |
| Ir | -1.09                          | 3.32                           | 1.55                         | 0.42                          |
| Pt | -1.08                          | 3.69                           | 2.06                         | 0.62                          |
| Au | -0.30                          | 4.27                           | 3.15                         | 0.99                          |

**Table S7.** The number of positive charge ( $N_{pc}$ ) for 29 active metals. (unit:  $e$ )

| TM | $N_{pc}$ |
|----|----------|
| Sc | 1.67     |
| Ti | 1.38     |
| V  | 1.21     |
| Cr | 1.23     |
| Mn | 1.26     |
| Fe | 1.11     |
| Co | 0.85     |
| Ni | 0.77     |
| Cu | 0.72     |
| Zn | 1.06     |
| Y  | 2.08     |
| Zr | 1.68     |
| Nb | 1.52     |
| Mo | 1.19     |
| Tc | 1.09     |
| Ru | 0.70     |
| Rh | 0.63     |
| Pd | 0.57     |
| Ag | 0.68     |
| Cd | 1.16     |
| Hf | 1.62     |
| Ta | 1.54     |
| W  | 1.29     |
| Re | 1.16     |
| Os | 0.91     |
| Ir | 0.64     |
| Pt | 0.60     |
| Au | 0.48     |
| Hg | 0.10     |

**Table S8.** The obtained electron ( $Q_{O_2}$ ) of adsorbed  $O_2$  possessed by 29 TM@C<sub>6</sub>N<sub>6</sub>. (unit:  $e$ )

| TM | $Q_{O_2}$ |
|----|-----------|
| Sc | 0.93      |
| Ti | 0.77      |
| V  | 0.74      |
| Cr | 0.78      |
| Mn | 0.50      |
| Fe | 0.75      |
| Co | 0.62      |
| Ni | 0.41      |
| Cu | 0.38      |
| Zn | 0.54      |
| Y  | 0.74      |
| Zr | 1.02      |
| Nb | 0.86      |
| Mo | 0.79      |
| Tc | 0.70      |
| Ru | 0.67      |
| Rh | 0.43      |
| Pd | 0.37      |
| Ag | 0.20      |
| Cd | 0.47      |
| Hf | 0.95      |
| Ta | 0.84      |
| W  | 0.85      |
| Re | 0.77      |
| Os | 0.73      |
| Ir | 0.47      |
| Pt | 0.45      |
| Au | 0.39      |
| Hg | 0.06      |

**Table S9.** The  $d$ -band center ( $\epsilon_d$ ) of TM for 29 TM@C<sub>6</sub>N<sub>6</sub>. (unit: eV)

| TM | $\epsilon_d$ |
|----|--------------|
| Sc | 0.45         |
| Ti | 0.53         |
| V  | 0.72         |
| Cr | -1.04        |
| Mn | -1.83        |
| Fe | -0.32        |
| Co | -1.39        |
| Ni | -2.02        |
| Cu | -1.55        |
| Zn | -7.33        |
| Y  | 2.37         |
| Zr | 1.00         |
| Nb | 0.22         |
| Mo | -0.69        |
| Tc | -1.88        |
| Ru | -1.25        |
| Rh | -2.46        |
| Pd | -1.70        |
| Ag | -2.62        |
| Cd | -9.15        |
| Hf | 1.59         |
| Ta | -0.49        |
| W  | -0.72        |
| Re | -1.71        |
| Os | -1.94        |
| Ir | -2.48        |
| Pt | -2.36        |
| Au | -2.79        |
| Hg | -3.54        |

**Table S10.** The integrater crystal orbit Hamilton population (ICOHP) between TM and O<sub>2</sub> for TM@C<sub>6</sub>N<sub>6</sub>.

| <b>TM</b> | <b>ICOHP</b> |
|-----------|--------------|
| Sc        | -2.17        |
| Ti        | -2.20        |
| V         | -2.19        |
| Cr        | -1.88        |
| Mn        | -1.07        |
| Fe        | -1.24        |
| Co        | -1.24        |
| Ni        | -0.87        |
| Cu        | -0.83        |
| Zn        | -0.85        |
| Y         | -2.55        |
| Zr        | -2.54        |
| Nb        | -2.34        |
| Mo        | -2.01        |
| Tc        | -1.82        |
| Ru        | -0.21        |
| Rh        | -1.95        |
| Pd        | -1.46        |
| Ag        | -0.26        |
| Cd        | -0.50        |
| Hf        | -3.03        |
| Ta        | -2.86        |
| W         | -2.44        |
| Re        | -1.89        |
| Os        | -2.06        |
| Ir        | -2.10        |
| Pt        | -2.01        |
| Au        | -1.33        |
| Hg        | -0.02        |

## Reference

- 1 J. K. Nørskov, J. Rossmeisl, A. Logadottir, L. Lindqvist, J. R. Kitchin, T. Bligaard and H. Jónsson, *J. Phys. Chem. B*, 2004, **108**, 17886-17892.
- 2 I. C. Man , H. Y. Su, F. Calle-Vallejo, H. A. Hansen, J. I. Martinez, N. G. Inoglu, J. Kitchin, T. F. Jaramillo, J. K. Nørskov and J. Rossmeisl, *ChemCatChem*, 2011, **3**, 1159-1165.
- 3 W. H. Zhao, L. F. Zhang, Q. Q. Luo, Z. P. Hu, W. H. Zhang, S. Smith and J. L. Yang, *ACS Catal.*, 2019, **9**, 3419–3425.
